## Asymptomatic Smokers: ASA I or II?

*To the Editor:*—Most anesthesiologists favor an ASA I classification for asymptomatic smokers and argue that smoking is not a disease; those opposed argue that even asymptomatic smokers have significant pathophysiologic changes and increased perioperative morbidity. I believe there is sufficient evidence to support the latter position and we as anesthesiologists should come to a consensus on this risk classification.

The ASA Physical Status Classification<sup>1</sup> defines class II as a "Mild to moderate systemic disturbance." Examples of ASA class II<sup>2</sup> include essential hypertension (which often is asymptomatic). Asymptomatic smokers have been found to have statistically significant increases in closing volumes<sup>3</sup> consistent with small airway disease. Asymptomatic smokers also have been shown to have abnormalities in mucociliary transport.<sup>4</sup>

Increased postoperative morbidity in patients smoking greater than 10 cigarettes a day has been known for some time.<sup>5</sup> Few studies look specifically at complications in asymptomatic smokers. One such study<sup>6</sup> found non-bronchitic smokers to have a 53 per cent incidence of chest complications *vs.* a 23 per cent incidence in nonsmokers.

The evidence points to both quantifiable disease and increased perioperative risk in even the asymptomatic

smoker. Surely this deserves a classification of a mild to moderate systemic disturbance.

JOSEPH BAYES, M.D.  
*Clinical Fellow in Anaesthesia*  
*Harvard Medical School*  
*Resident in Anaesthesia*  
*Beth Israel Hospital*  
*Boston, Massachusetts 02215*

## REFERENCES

1. American Society of Anesthesiologists new classification of physical status. *ANESTHESIOLOGY* 24:111, 1963
2. Dripps RD, Echkenhoff JE, Vandam LD: *Introduction to Anesthesia: The Principles of Safe Practice*. Philadelphia, WB Saunders, 1977, p 14
3. McCarthy DS, Spencer R, Greene R, et al: Measurement of "closing volume" as a simple and sensitive test for early detection of small airway disease. *Am J Med* 52:747-753, 1972
4. Lourenco RV, Klimek MF, Borowski CJ: Deposition and clearance of two micron particles in the tracheobronchial tree of normal subjects—smokers and nonsmokers. *J Clin Invest* 50:1411-1419, 1971
5. Morton HJV: Tobacco smoking and pulmonary complications after operation. *Lancet* 1:368-370, 1944
6. Laszlo G, Archer GG, Darrell JH, et al: The diagnosis of pulmonary complications of surgical operations. *Br J Surg* 60:129-134, 1973

(Accepted for publication July 28, 1981.)
